# Supplementary material
Source: MDPI journal article supplement (https://www.mdpi.com/1424-8247/15/1/51)

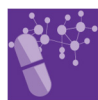

# Discovery of Small Molecules as Membrane-Bound Catechol-*O*-methyltransferase Inhibitors with Interest in Parkinson's Disease: Pharmacophore Modeling, Molecular Docking and In Vitro Experimental Validation Studies

Pedro Cruz-Vicente <sup>1,2,†</sup>, Ana M. Gonçalves <sup>1,2,3,†</sup>, Octávio Ferreira <sup>1</sup>, João A. Queiroz <sup>1</sup>, Samuel Silvestre <sup>1,4,5,\*</sup>, Luís A. Passarinha <sup>1,2,3,5,\*</sup> and Eugenia Gallardo <sup>1,5,\*</sup>

<sup>1</sup> CICS-UBI, Health Sciences Research Centre, Universidade da Beira Interior, 6201-001 Covilha, Portugal; pedromvcruz@hotmail.com (P.C.-V.); ggmargarida@gmail.com (A.M.G.); octavioferreira.2@gmail.com (O.F.); jqueiroz@ubi.pt (J.A.Q.)

<sup>2</sup> UCIBIO—Applied Molecular Biosciences Unit, Departamento de Química, Faculdade de Ciências e Tecnologia, Universidade NOVA de Lisboa, 2829-516 Caparica, Portugal

<sup>3</sup> Associate Laboratory i4HB—Institute for Health and Bioeconomy, NOVA School of Science and Technology, Universidade NOVA, 2819-516 Caparica, Portugal

<sup>4</sup> CNC—Center for Neuroscience and Cell Biology, University of Coimbra, 3004-504 Coimbra, Portugal

<sup>5</sup> Laboratório de Fármaco-Toxicologia—UBIMedical, Universidade da Beira Interior, 6200-001 Covilha, Portugal

\* Correspondence: sms@ubi.pt (S.S.); lpassarinha@fcsaude.ubi.pt (L.A.P.); egallardo@fcsaude.ubi.pt (E.G.); Tel.: +351-275-329-002 (S.S. & L.A.P. & E.G.)

† These authors contributed equally to this paper.

## Supplementary material

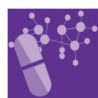**Table S1.** Characteristics of the studied compounds.

| Compound       | RMSD (Å) | Molecular Weight (Da) | Routable bonds |
|----------------|----------|-----------------------|----------------|
| ZINC92701879   | 1.049    | 298                   | 7              |
| ZINC302226     | 0.987    | 298                   | 3              |
| ZINC06520424   | 1.113    | 250                   | 6              |
| ZINC03022616   | 1.062    | 466                   | 9              |
| ZINC605706834  | 1.018    | 480                   | 2              |
| ZINC98288      | 0.890    | 257                   | 3              |
| ZINC07056138   | 1.074    | 302                   | 6              |
| ZINC68675288   | 0.755    | 236                   | 1              |
| ZINC63699107   | 0.950    | 323                   | 3              |
| ZINC825166420  | 1.150    | 277                   | 2              |
| ZINC72195935   | 0.662    | 293                   | 7              |
| ZINC78496496   | 0.977    | 262                   | 2              |
| ZINC00002021   | 0.951    | 348                   | 7              |
| ZINC92121085   | 0.960    | 336                   | 6              |
| ZINC09287838   | 0.975    | 307                   | 3              |
| ZINC38175059   | 0.669    | 213                   | 2              |
| ZINC95473053   | 0.879    | 473                   | 5              |
| ZINC72200820   | 0.782    | 213                   | 9              |
| ZINC94057102   | 0.897    | 327                   | 6              |
| ZINC38549642   | 0.730    | 339                   | 7              |
| ZINC16310105   | 0.953    | 445                   | 6              |
| ZINC27985035   | 0.697    | 180                   | 1              |
| ZINC1547205762 | 1.265    | 406                   | 4              |
| ZINC90891275   | 0.785    | 356                   | 9              |
| ZINC83307569   | 0.650    | 245                   | 5              |
| ZINC59246393   | 0.870    | 263                   | 4              |

**Table S2.** Virtual screening results of the hit molecules obtained in ZINCPharmer.

| Compound.      | Binding energy<br>(kcal/mol) | Intermolecular energy<br>(kcal/mol) |
|----------------|------------------------------|-------------------------------------|
| ZINC4706996    | -7.65                        | -9.14                               |
| ZINC4776068    | -7.61                        | -8.51                               |
| ZINC825166420  | -7.48                        | -8.67                               |
| ZINC1547205762 | -7.39                        | -9.47                               |
| ZINC61887498   | -6.98                        | -7.87                               |
| ZINC98288      | -6.98                        | -8.77                               |
| ZINC301795     | -6.88                        | -8.67                               |
| ZINC95473053   | -6.79                        | -9.48                               |
| ZINC95477008   | -6.78                        | -8.87                               |
| ZINC68677292   | -6.78                        | -7.68                               |
| ZINC38515687   | -6.74                        | -8.23                               |
| ZINC4783172    | -6.7                         | -7.6                                |
| ZINC302226     | -6.63                        | -8.12                               |
| ZINC4522753    | -6.58                        | -7.48                               |
| ZINC72194201   | -6.52                        | -7.72                               |
| ZINC5123812    | -6.52                        | -8.31                               |
| ZINC4770553    | -6.48                        | -7.67                               |
| ZINC5699358    | -6.48                        | -7.67                               |
| ZINC27985035   | -6.26                        | -7.15                               |
| ZINC605706834  | -6.24                        | -7.05                               |
| ZINC71404891   | -6.15                        | -7.04                               |
| ZINC78496496   | -6.12                        | -7.32                               |
| ZINC95836232   | -6.07                        | -8.76                               |
| ZINC1611750    | -6.06                        | -7.25                               |
| ZINC38175059   | -6.04                        | -7.53                               |
| ZINC72194198   | -6.01                        | -7.2                                |
| ZINC68675288   | -5.9                         | -7.1                                |
| ZINC78496489   | 5.85                         | -7.34                               |
| ZINC478514     | -5.82                        | -7.9                                |
| ZINC72194202   | -5.67                        | -7.17                               |
| ZINC2038230    | -5.37                        | -6.56                               |
| ZINC95635255   | -5.2                         | -6.69                               |
| ZINC27977563   | -5.11                        | -6.6                                |
| ZINC34064982   | -5.06                        | -6.55                               |
| ZINC90685655   | -4.96                        | -6.16                               |
| ZINC82401665   | -4.94                        | -6.13                               |
| 3,5-DNC        | -4.85                        | -6.05                               |
| ZINC90598152   | -4.63                        | -6.12                               |
| ZINC95836233   | -4.53                        | -6.32                               |
| ZINC337530     | -4.27                        | -6.06                               |
| ZINC3861001    | -3.89                        | -7.17                               |

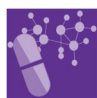

**Table S3.** Results of *in vitro* MBCOMT inhibition evaluation of the 10 best scored selected. compounds by *in silico* studies.

| Tested compounds | Concentration ( $\mu\text{M}$ ) | Inhibition (%) |
|------------------|---------------------------------|----------------|
| ZINC302226       | 10                              | 56             |
|                  | 100                             | 100            |
| ZINC605706834    | 10                              | 39             |
|                  | 100                             | 34             |
| ZINC98288        | 10                              | 100            |
|                  | 100                             | 100            |
| ZINC68675288     | 10                              | 40             |
|                  | 100                             | 43             |
| ZINC825166420    | 10                              | 72             |
|                  | 100                             | 100            |
| ZINC1547205762   | 10                              | 14             |
|                  | 100                             | 27             |
| ZINC95473053     | 10                              | 41             |
|                  | 100                             | 46             |
| ZINC27985035     | 10                              | 100            |
|                  | 100                             | 100            |
| ZINC78496496     | 10                              | 81             |
|                  | 100                             | 100            |
| ZINC38175059*    | 10                              | 100            |
|                  | 100                             | 100            |

\*This compound has not advanced for  $\text{IC}_{50}$  determinations due to the lower affinity observed in docking studies.



Figure S1. Graphics of concentration-response studies in dopaminergic N27 cell line.

## N27

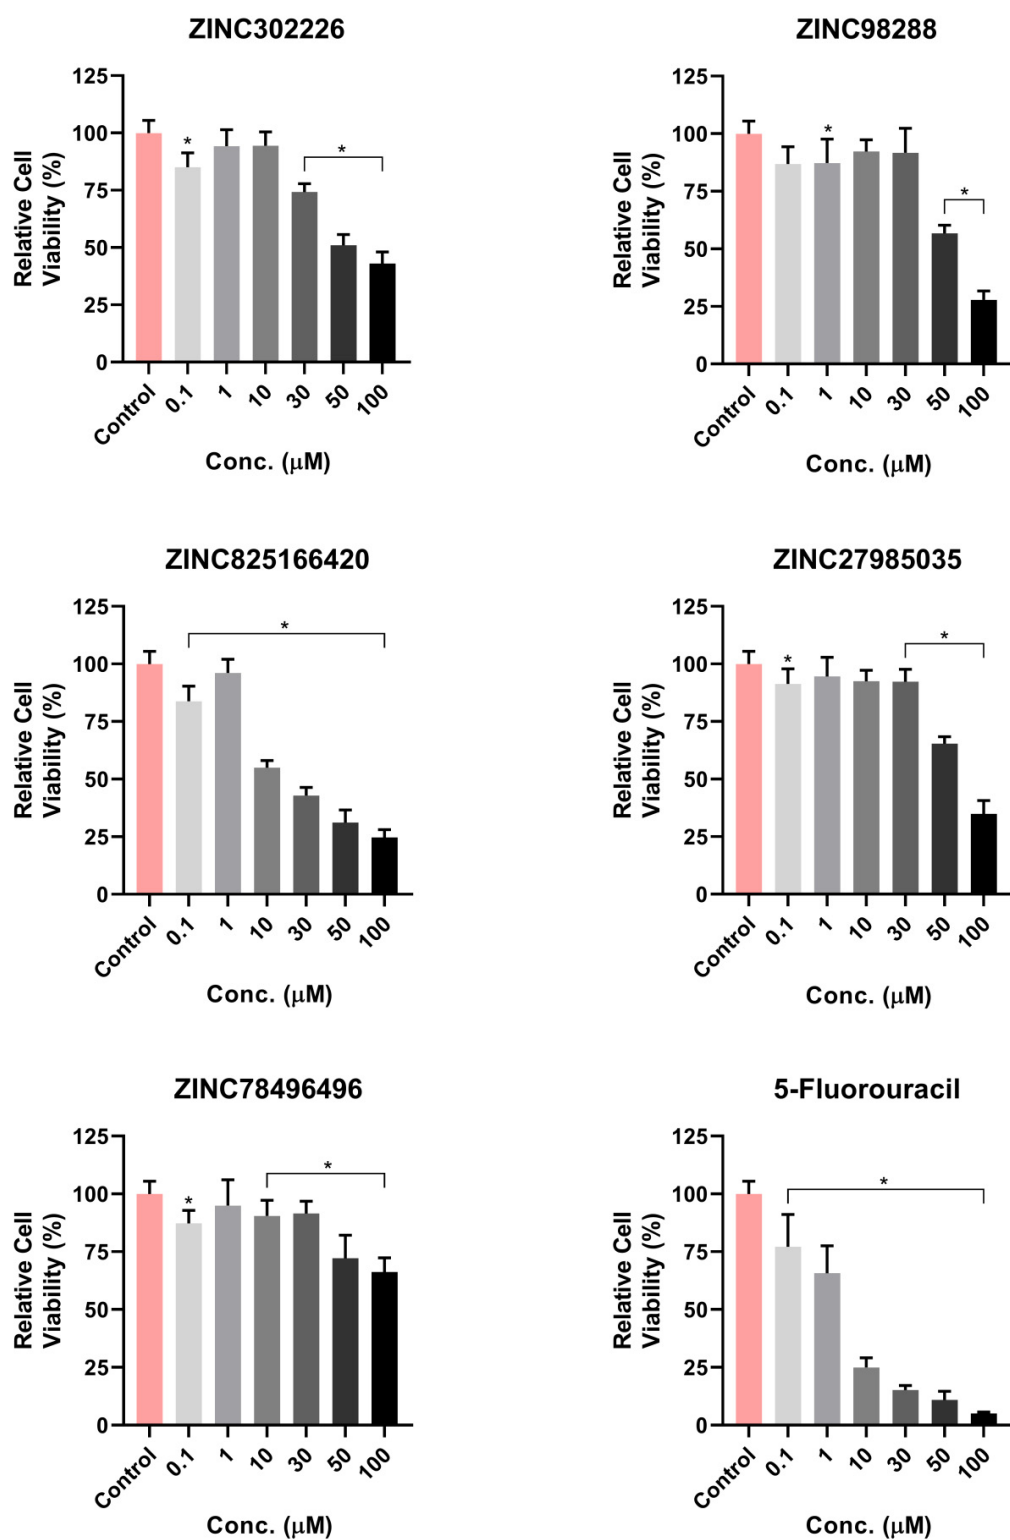



Figure S2. Graphics of concentration-response studies in normal human dermal fibroblasts (NHDF).

## NHDF

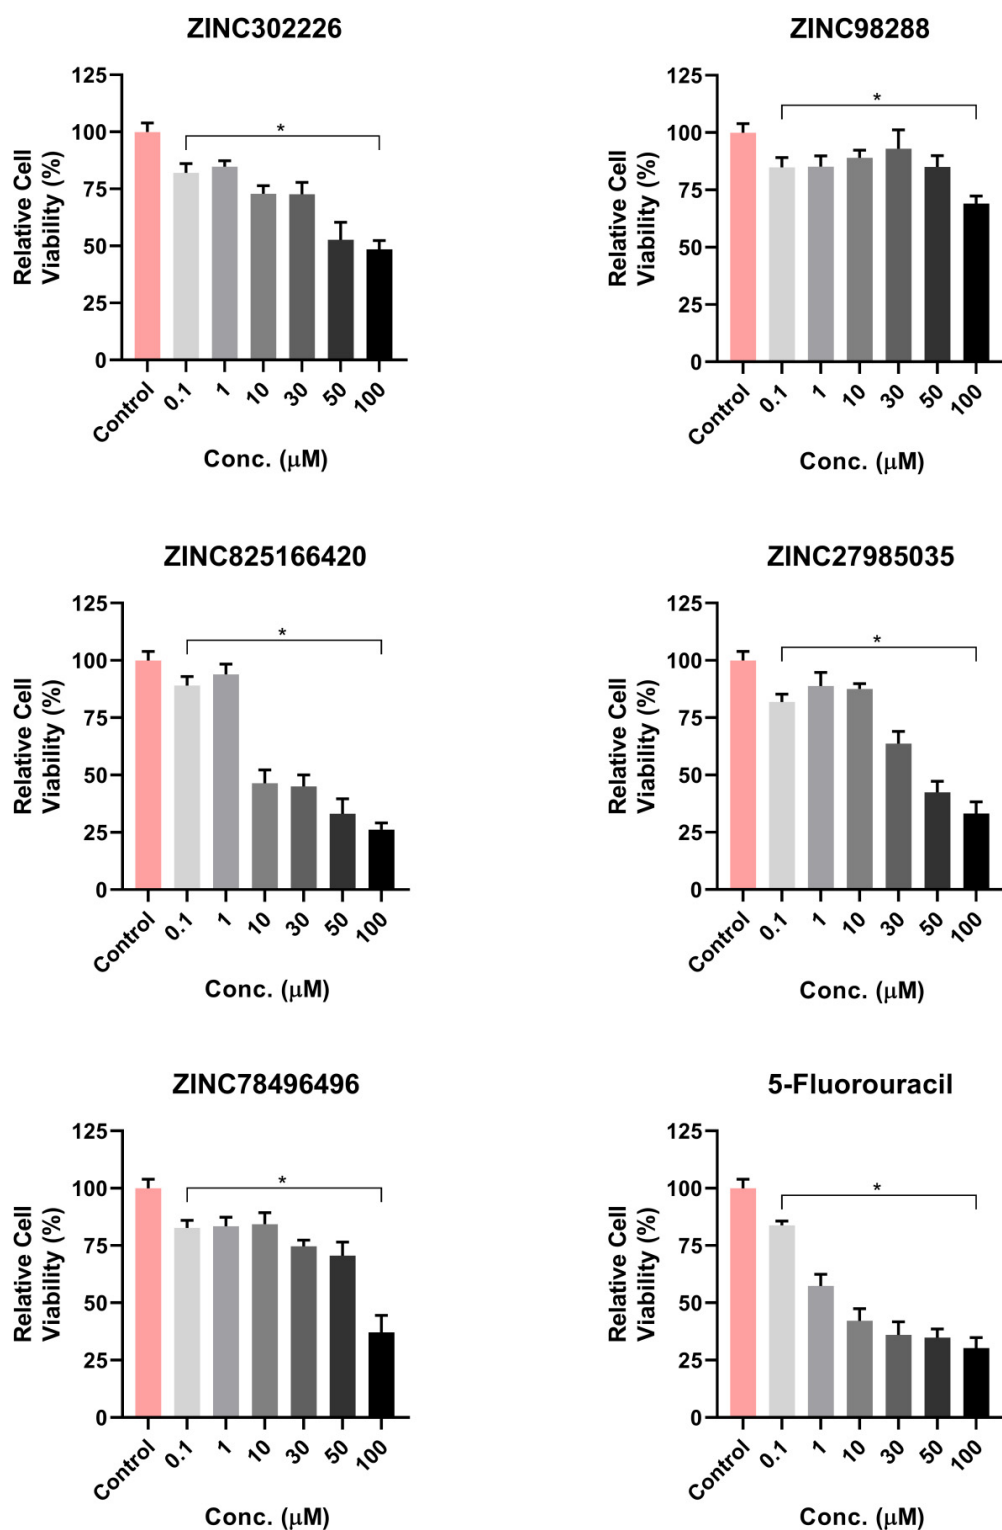

Supplement: s1 [file s1]
